# Supplementary material for: Evaluation of portable devices for medicine quality screening: Lessons learnt, recommendations for implementation, and future priorities
Source: PubMed Central journal article supplement (PMC8483386; doi:10.1371/journal.pmed.1003747), 2021-09-30
Supplement: pmed.1003747.s001.pdf [file pmed.1003747.s001.pdf]

**S1 Table. Devices included in the study. Devices in bold were included in both laboratory and field evaluation phases**

| Device name                             | Manufacturer or Institution                                                                                 | Market status  | Technology<br>Main Specification                                        | Handheld | Cost <sup>a,b</sup>                                                                                                                                                    |
|-----------------------------------------|-------------------------------------------------------------------------------------------------------------|----------------|-------------------------------------------------------------------------|----------|------------------------------------------------------------------------------------------------------------------------------------------------------------------------|
| <b>4500a FTIR Single Reflection</b>     | Agilent Technologies                                                                                        | M              | FTIR-MIR<br>Spectral range<br>4000cm <sup>-1</sup> -650cm <sup>-1</sup> | N        | US\$ 31,067                                                                                                                                                            |
| <b>C-Vue</b>                            | C-Vue                                                                                                       | M <sup>c</sup> | Liquid chromatography                                                   | N        | One unit with 214nm detector: ~US\$ 4,950<br>Stationary Column: ~US\$ 370<br>Additional 254 nm detector: ~US\$ 1,295<br>Accessories for sample preparation : ~US\$ 175 |
| <b>Minilab</b>                          | Global Pharma Health Fund E.V.                                                                              | M              | TLC, disintegration test                                                | N        | US\$ 2,510 (without reference standards)                                                                                                                               |
| <b>MicroPHAZIR RX</b>                   | ThermoFisher Scientific                                                                                     | M              | FTIR - NIR<br>Wavelength range<br>1600nm-2400nm                         | Y        | US\$47,500                                                                                                                                                             |
| <b>Neospectra 2.5 (SWS62221-2.5)</b>    | Si-Ware                                                                                                     | M              | FTIR-NIR<br>Wavelength range<br>1350nm-2500nm                           | N        | Neospectra 2.5: US\$ 3,000<br>Light Source: US\$1,030<br>White Reference Tile: US\$310<br>Fiberoptic Cable and Probe: US\$1,261<br>Probe Holder: US\$67.83             |
| <b>NIR-S-G1</b>                         | Young Green Energy –Innospectra <sup>d</sup><br>(the Global Good Fund developed the smartphone application) | M <sup>e</sup> | NIR - Dispersive<br>Wavelength range<br>900nm-1,700nm                   | Y        | US\$1,199 (without smartphone)                                                                                                                                         |
| <b>Paper Analytical Device</b>          | University of Notre-Dame and Veripad<br>(Kenya, New-York and Boston)                                        | D              | Paper-based colour test                                                 | Y (S)    | US\$3                                                                                                                                                                  |
| <b>PharmaChk</b>                        | Boston University                                                                                           | D              | Microfluidic device with luminescence detection                         | N        | Unknown <sup>f</sup>                                                                                                                                                   |
| <b>Progeny</b>                          | Rigaku                                                                                                      | M              | Raman<br>1064 nm laser                                                  | Y        | (ex-demo model)                                                                                                                                                        |
| <b>TruScan RM</b>                       | ThermoFisher Scientific                                                                                     | M              | Raman<br>785 nm laser                                                   | Y        | US\$ 62,500 (including chemometric software package and tablet holder)                                                                                                 |
| <b>Unnamed-Lateral flow immunoassay</b> | China Agricultural University of Beijing and University of Pennsylvania                                     | D              | Lateral flow immunoassay dipsticks                                      | Y (S)    | US\$ 2-3 <sup>g</sup>                                                                                                                                                  |
| <b>Single-quadrupole QDa MS</b>         | Waters                                                                                                      | M              | Mass spectrometry                                                       | N        | US\$ 76,169                                                                                                                                                            |

D: Under development, FTIR: Fourier Transform Infrared, M: Marketed, MS: Mass spectrometry, N: No, NIR: Near infrared, Y: Yes, HPLC: High Performance Liquid Chromatography, NIR: Near Infrared, MIR: Mid-Infrared, TLC: Thin-layer chromatography, S: Single-use device

a Ordering several devices to the manufacture is subject to potential reduced purchase cost

b The costs reported here do not include VAT and may vary by country of purchase

c The device is available for purchase but has been only used as an educational tool

d At the time of the study the NIR unit was produced by Young Green energy. It has been taken over by InnoSpectra Corporation.

e The near-infrared sampling unit is marketed but the smartphone application is not

f The device was lent by the developer and is still under development, and not available for purchase as far as we are aware

g Cost estimated by the manufacturer. The device is not marketed yet and is subject to variation. Purchasing several RDTs is subject to potential reduced purchase cost.
