# Supplementary material for: Evaluation of portable devices for medicine quality screening: Lessons learnt, recommendations for implementation, and future priorities
Source: PubMed Central journal article supplement (PMC8483386; doi:10.1371/journal.pmed.1003747), 2021-09-30
Supplement: pmed.1003747.s005.pdf [file pmed.1003747.s005.pdf]

| <b>User Experience</b> | <b>User Type</b> |                     |                  |
|------------------------|------------------|---------------------|------------------|
|                        | <i>Basic</i>     | <i>Intermediate</i> | <i>Advanced</i>  |
| <i>Non-technical</i>   | 1 to 2 days      | 1 week              | 2 weeks          |
| <i>Technical</i>       | 1 day            | 1 day to 1 week     | 1 to 2 weeks     |
| <i>Specialized</i>     | 1 to 2 hours     | 1 day               | Less than 1 week |
